# Supplementary material for: The Influence of Metabolic Syndrome on Potential Aging Biomarkers in Participants with Metabolic Syndrome Compared to Healthy Controls
Source: MDPI journal article supplement (doi:10.3390/biomedicines12010242), 2024-01-22
Supplement: s1 [file s1]

Supplementary Table S1. Metabolic syndrome data according to age, gender.

| Group <35     |    |        |        |       |       |       |         |
|---------------|----|--------|--------|-------|-------|-------|---------|
|               | N  | 25q    | Median | 75q   | Min   | Max   |         |
| BMI no MS     | 48 | 22.56  | 24.56  | 27.49 | 18.21 | 32.53 | p<0.01  |
| BMI yes MS    | 9  | 27.13  | 28.48  | 31.07 | 25.31 | 45.17 |         |
|               | N  | 25q    | Median | 75q   | Min   | Max   |         |
| sys no MS     | 48 | 109.75 | 121    | 131   | 100   | 151   | NS      |
| sys yes MS    | 9  | 122.00 | 130    | 143   | 108   | 150   |         |
|               | N  | 25q    | Median | 75q   | Min   | Max   |         |
| dia no MS     | 48 | 70     | 75.5   | 82.25 | 60    | 95    | p<0.01  |
| dia yes MS    | 9  | 85     | 85.0   | 90.00 | 81    | 90    |         |
|               | N  | 25q    | Median | 75q   | Min   | Max   |         |
| waist no MS   | 48 | 73     | 78.5   | 88.5  | 66    | 109   | p<0.001 |
| waist yes MS  | 9  | 94     | 99.0   | 110.0 | 88    | 116   |         |
|               | N  | 25q    | Median | 75q   | Min   | Max   |         |
| GLU no MS     | 48 | 3.97   | 4.50   | 4.85  | 2.42  | 5.93  | NS      |
| GLU yes MS    | 9  | 4.27   | 4.62   | 4.79  | 3.96  | 4.87  |         |
|               | N  | 25q    | Median | 75q   | Min   | Max   |         |
| CHOL no MS    | 48 | 3.93   | 4.29   | 4.63  | 2.39  | 6.77  | NS      |
| CHOL yes MS   | 9  | 3.81   | 4.35   | 4.88  | 2.90  | 6.12  |         |
|               | N  | 25q    | Median | 75q   | Min   | Max   |         |
| nonHDL no MS  | 48 | 2.28   | 2.65   | 3.21  | 1.52  | 5.50  | NS      |
| nonHDL yes MS | 9  | 03.07  | 3.58   | 3.94  | 1.60  | 4.87  |         |
|               | N  | 25q    | Median | 75q   | Min   | Max   |         |
| TAG no MS     | 48 | 0.8    | 1.14   | 1.39  | 0.47  | 2.00  | p<0.05  |
| TAG yes MS    | 9  | 1.2    | 1.87   | 2.33  | 0.51  | 3.14  |         |
|               | N  | 25q    | Median | 75q   | Min   | Max   |         |
| HDLC no MS    | 48 | 1.33   | 1.46   | 1.72  | 0.87  | 2.25  | p<0.001 |
| HDLC yes MS   | 9  | 0.88   | 0.94   | 01.02 | 0.74  | 1.30  |         |
|               | N  | 25q    | Median | 75q   | Min   | Max   |         |
| LDLV no MS    | 48 | 1.94   | 2.13   | 2.66  | 0.85  | 4.6   | NS      |
| LDLV yes MS   | 9  | 2.12   | 2.54   | 3.43  | 1.37  | 4.1   |         |
| Group 30–50   |    |        |        |       |       |       |         |
|               | N  | 25q    | Median | 75q   | Min   | Max   |         |
| BMI no MS     | 31 | 24.12  | 25.62  | 27.79 | 19.36 | 32.00 | p<0.001 |

|                      |          |            |               |            |            |            |         |
|----------------------|----------|------------|---------------|------------|------------|------------|---------|
| BMI yes MS           | 28       | 26.88      | 29.58         | 32.98      | 23.15      | 42.45      |         |
|                      | <b>N</b> | <b>25q</b> | <b>Median</b> | <b>75q</b> | <b>Min</b> | <b>Max</b> |         |
| sys no MS            | 31       | 112.5      | 120.0         | 130        | 100        | 148        | p<0.001 |
| sys yes MS           | 28       | 130.0      | 136.5         | 141        | 112        | 160        |         |
|                      | <b>N</b> | <b>25q</b> | <b>Median</b> | <b>75q</b> | <b>Min</b> | <b>Max</b> |         |
| dia no MS            | 31       | 72.5       | 78.0          | 84.5       | 64         | 91         | p<0.001 |
| dia yes MS           | 28       | 82.5       | 89.5          | 96.0       | 12         | 100        |         |
|                      | <b>N</b> | <b>25q</b> | <b>Median</b> | <b>75q</b> | <b>Min</b> | <b>Max</b> |         |
| waist no MS          | 31       | 78         | 85            | 88.00      | 54         | 102        | p<0.001 |
| waist yes MS         | 28       | 91         | 100           | 107.75     | 75         | 125        |         |
|                      | <b>N</b> | <b>25q</b> | <b>Median</b> | <b>75q</b> | <b>Min</b> | <b>Max</b> |         |
| GLU no MS            | 31       | 4.20       | 4.55          | 4.86       | 3.52       | 6.61       | p<0.05  |
| GLU yes MS           | 28       | 4.49       | 4.94          | 5.43       | 3.76       | 7.81       |         |
|                      | <b>N</b> | <b>25q</b> | <b>Median</b> | <b>75q</b> | <b>Min</b> | <b>Max</b> |         |
| CHOL no MS           | 31       | 4.42       | 4.73          | 05.06      | 3.44       | 6.12       | NS      |
| CHOL yes MS          | 28       | 4.63       | 05.06         | 5.66       | 3.64       | 6.88       |         |
|                      | <b>N</b> | <b>25q</b> | <b>Median</b> | <b>75q</b> | <b>Min</b> | <b>Max</b> |         |
| nonHDL no MS         | 31       | 2.62       | 3.25          | 3.88       | 1.79       | 5.29       | p<0.05  |
| nonHDL yes MS        | 28       | 3.27       | 3.96          | 4.60       | 2.51       | 5.88       |         |
|                      | <b>N</b> | <b>25q</b> | <b>Median</b> | <b>75q</b> | <b>Min</b> | <b>Max</b> |         |
| TAG no MS            | 31       | 0.80       | 01.04         | 1.56       | 0.39       | 03.04      | p<0.001 |
| TAG yes MS           | 28       | 1.65       | 2.10          | 2.53       | 0.92       | 11.05      |         |
|                      | <b>N</b> | <b>25q</b> | <b>Median</b> | <b>75q</b> | <b>Min</b> | <b>Max</b> |         |
| HDLC no MS           | 31       | 1.21       | 1.40          | 1.57       | 0.75       | 2.63       | p<0.001 |
| HDLC yes MS          | 28       | 0.96       | 01.06         | 1.13       | 0.75       | 1.55       |         |
|                      | <b>N</b> | <b>25q</b> | <b>Median</b> | <b>75q</b> | <b>Min</b> | <b>Max</b> |         |
| LDLV no MS           | 31       | 2.37       | 2.73          | 3.16       | 1.41       | 4.55       | NS      |
| LDLV yes MS          | 27       | 2.60       | 2.93          | 3.43       | 1.64       | 4.52       |         |
| <b>Group &gt; 50</b> |          |            |               |            |            |            |         |
|                      | <b>N</b> | <b>25q</b> | <b>Median</b> | <b>75q</b> | <b>Min</b> | <b>Max</b> |         |
| sys no MS            | 32       | 113.5      | 124.5         | 134.25     | 100        | 150        | p<0.001 |
| sys yes MS           | 21       | 130.0      | 136.0         | 145.00     | 119        | 163        |         |
|                      | <b>N</b> | <b>25q</b> | <b>Median</b> | <b>75q</b> | <b>Min</b> | <b>Max</b> |         |
| dia no MS            | 32       | 74.75      | 80            | 85.25      | 63         | 99         | p<0.001 |
| dia yes MS           | 21       | 85.00      | 87            | 90.00      | 56         | 100        |         |

|               |    |        |        |        |       |       |         |
|---------------|----|--------|--------|--------|-------|-------|---------|
|               | N  | 25q    | Median | 75q    | Min   | Max   |         |
| waist no MS   | 32 | 75     | 78.5   | 91.25  | 68    | 99    | p<0.001 |
| waist yes MS  | 21 | 103    | 106.0  | 112.00 | 84    | 122   |         |
|               | N  | 25q    | Median | 75q    | Min   | Max   |         |
| GLU no MS     | 32 | 3.71   | 4.58   | 5.10   | 2.37  | 7.52  | NS      |
| GLU yes MS    | 21 | 4.49   | 05.05  | 5.51   | 3.76  | 6.16  |         |
|               | N  | 25q    | Median | 75q    | Min   | Max   |         |
| CHOL no MS    | 32 | 4.59   | 5.15   | 5.74   | 4.15  | 7.16  | NS      |
| CHOL yes MS   | 21 | 4.91   | 5.46   | 06.04  | 4.41  | 6.91  |         |
|               | N  | 25q    | Median | 75q    | Min   | Max   |         |
| nonHDL no MS  | 32 | 2.95   | 3.44   | 4.25   | 02.06 | 5.17  | p<0.001 |
| nonHDL yes MS | 21 | 3.76   | 4.37   | 4.75   | 3.34  | 5.47  |         |
|               | N  | 25q    | Median | 75q    | Min   | Max   |         |
| TAG no MS     | 32 | 0.78   | 01.07  | 1.31   | 0.60  | 02.08 | p<0.001 |
| TAG yes MS    | 21 | 1.38   | 1.82   | 2.46   | 01.04 | 3.32  |         |
|               | N  | 25q    | Median | 75q    | Min   | Max   |         |
| LDLV no MS    | 32 | 2.56   | 2.95   | 3.47   | 1.75  | 4.48  | p<0.05  |
| LDLV yes MS   | 21 | 3.00   | 3.23   | 3.79   | 2.68  | 4.52  |         |
|               | N  | 25q    | Median | 75q    | Min   | Max   |         |
| HDLC no MS    | 32 | 1.27   | 1.79   | 02.04  | 1.00  | 2.54  | p<0.001 |
| HDLC yes MS   | 21 | 01.01  | 1.22   | 1.33   | 0.72  | 02.03 |         |
| Gender        |    |        |        |        |       |       |         |
|               | N  | 25q    | Median | 75q    | Min   | Max   |         |
| BMI Female    | 84 | 22.66  | 24.96  | 28.55  | 18.21 | 45.17 | p<0.01  |
| BMI Male      | 85 | 25.28  | 27.16  | 29.36  | 18.79 | 38.06 |         |
|               | N  | 25q    | Median | 75q    | Min   | Max   |         |
| sys Female    | 84 | 110.75 | 120    | 130    | 100   | 163   | p<0.001 |
| sys Male      | 85 | 123.00 | 133    | 141    | 100   | 162   |         |
|               | N  | 25q    | Median | 75q    | Min   | Max   |         |
| dia Female    | 84 | 71.75  | 79.5   | 87     | 60    | 100   | p<0.05  |
| dia Male      | 85 | 77.00  | 84.0   | 90     | 12    | 100   |         |
|               | N  | 25q    | Median | 75q    | Min   | Max   |         |
| waist Female  | 84 | 73     | 78     | 88.25  | 66    | 125   | p<0.001 |
| waist Male    | 85 | 88     | 95     | 104.00 | 54    | 122   |         |
|               | N  | 25q    | Median | 75q    | Min   | Max   |         |

|               |          |            |               |            |            |            |         |
|---------------|----------|------------|---------------|------------|------------|------------|---------|
| GLU Female    | 84       | 4.00       | 4.62          | 5.20       | 2.76       | 7.81       | NS      |
| GLU Male      | 85       | 4.12       | 4.63          | 4.97       | 2.37       | 6.46       |         |
|               | <b>N</b> | <b>25q</b> | <b>Median</b> | <b>75q</b> | <b>Min</b> | <b>Max</b> |         |
| CHOL Female   | 84       | 4.22       | 4.62          | 5.30       | 2.90       | 7.16       | NS      |
| CHOL Male     | 85       | 4.42       | 4.81          | 5.36       | 2.39       | 6.91       |         |
|               | <b>N</b> | <b>25q</b> | <b>Median</b> | <b>75q</b> | <b>Min</b> | <b>Max</b> |         |
| nonHDL Female | 84       | 2.48       | 03.06         | 3.66       | 1.52       | 5.77       | p<0.001 |
| nonHDL Male   | 85       | 3.17       | 3.63          | 4.35       | 1.52       | 5.88       |         |
|               | <b>N</b> | <b>25q</b> | <b>Median</b> | <b>75q</b> | <b>Min</b> | <b>Max</b> |         |
| TAG Female    | 84       | 0.78       | 1.1           | 1.50       | 0.39       | 4.48       | p<0.001 |
| TAG Male      | 85       | 01.08      | 1.5           | 02.04      | 0.47       | 11.05      |         |
|               | <b>N</b> | <b>25q</b> | <b>Median</b> | <b>75q</b> | <b>Min</b> | <b>Max</b> |         |
| HDLC Female   | 84       | 1.31       | 1.57          | 1.90       | 0.87       | 2.63       | p<0.001 |
| HDLC Male     | 85       | 1.00       | 1.17          | 1.36       | 0.72       | 2.21       |         |
|               | <b>N</b> | <b>25q</b> | <b>Median</b> | <b>75q</b> | <b>Min</b> | <b>Max</b> |         |
| LDLV Female   | 84       | 02.01      | 2.52          | 3.14       | 1.16       | 4.52       | p<0.01  |
| LDLV Male     | 84       | 2.56       | 2.92          | 3.32       | 0.85       | 4.60       |         |

Legend: N, number of participants; NS, non-significant p value; Yes MS, participants with metabolic syndrome; No MS, participants without metabolic syndrome; Sys: systolic blood pressure; Dia: diastolic blood pressure; Waist in cm; GLU: fasting glucose; CHOL: total cholesterol; nonHDL: non high density lipoproteins; TAG: triacylglycerols; HDLC: high density lipoproteins; LDLV: low density lipoproteins
